# Supplementary figures and images for: Utility of a Hydrolysate from Overproduced Paralichthys olivaceus for Hypertension Treatment: Correlation between Physical Properties and Potent Anti-Hypertensive Activities
Source: MDPI journal article supplement (doi:10.3390/md20060346), 2022-05-25

## Supplementary Materials

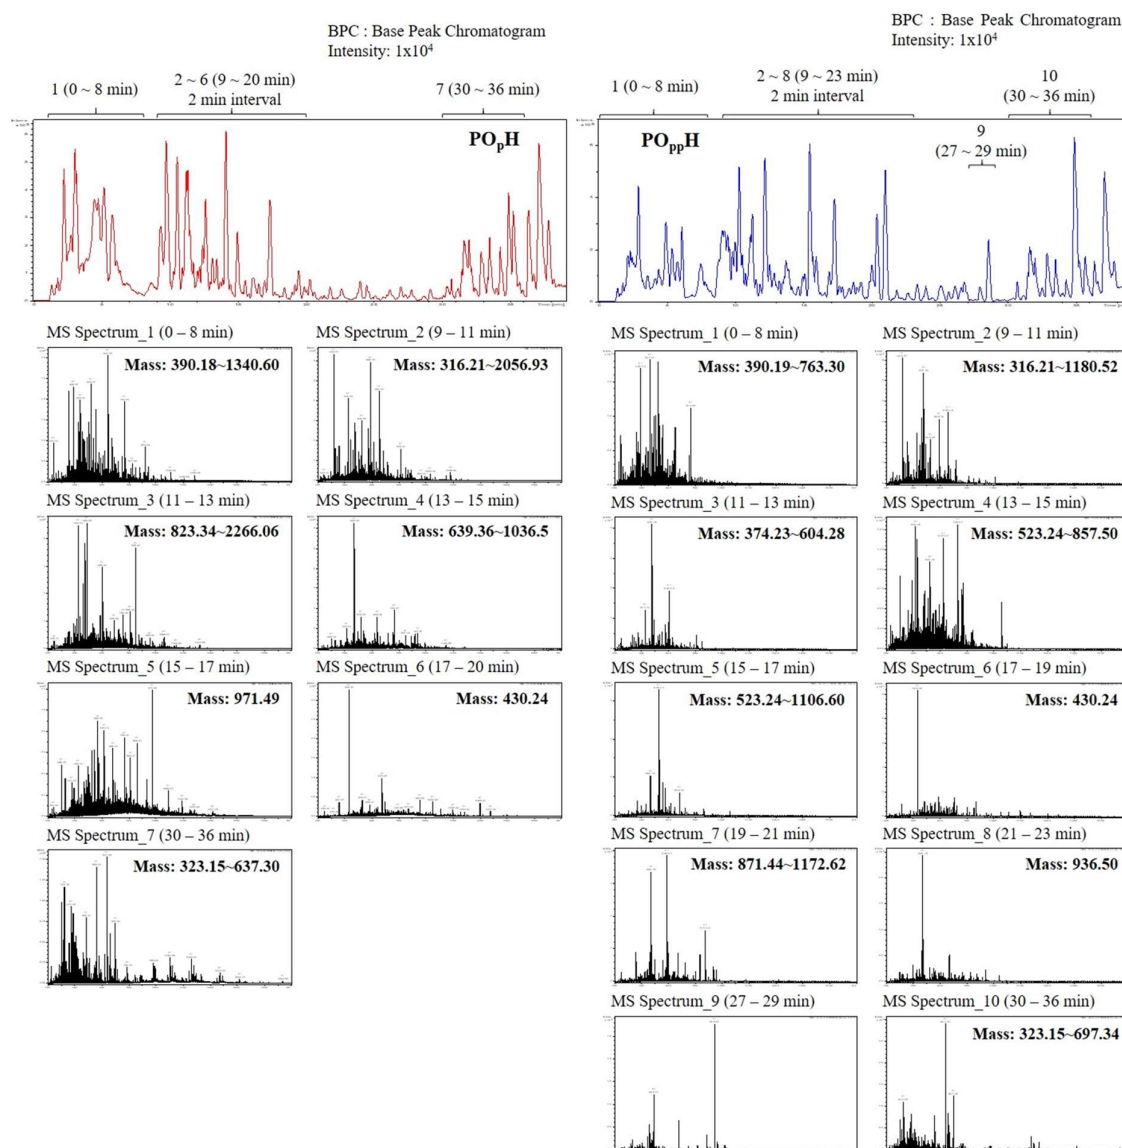

Figure S1. Molecular distributions of PO<sub>p</sub>H and PO<sub>pp</sub>H

Supplement: s1 [file s1]
